# Supplementary material for: Computational design of a switchable heterostructure electrocatalyst based on a two-dimensional ferroelectric In2Se3 material for the hydrogen evolution reaction
Source: Royal Society of Chemistry journal article supplement (doi:10.1039/d0ta09738a), 2021-01-01
Supplement: d0ta09738a1.pdf [file d0ta09738a1.pdf]

Supplementary Information

**Computational design of a switchable heterostructure electrocatalyst  
based on a two-dimensional ferroelectric  $\text{In}_2\text{Se}_3$  material for the hydrogen  
evolution reaction**

Han Seul Kim<sup>\*ab</sup>

<sup>a</sup>. Centre for Supercomputing Applications, National Institute of Supercomputing and  
Networking, Korea Institute of Science and Technology Information, Daejeon 34141,  
Republic of Korea

<sup>b</sup>. Department of Data & High Performance Computing Science, University of Science &  
Technology (UST), Daejeon 34113, Republic of Korea

\* hanseulkim0@kisti.re.kr

## Supplementary Figures

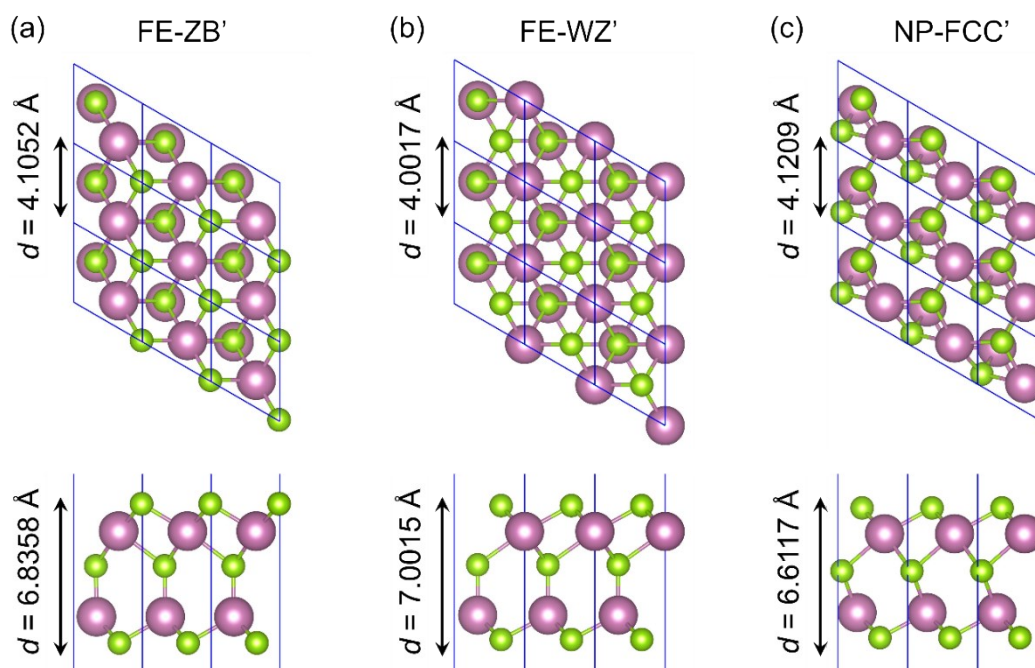

**Fig. S1.** Three different phases of the quintuple-layer  $\text{In}_2\text{Se}_3$ : (a) ferroelectric zinc blende (FE-ZB'), (b) ferroelectric wurtzite (FE-WZ'), and (c) nonpolar face-centered cubic (NP-FCC') structures. Among the three phases, FE-ZB' and FE-WZ' are two degenerate ground-state structures.

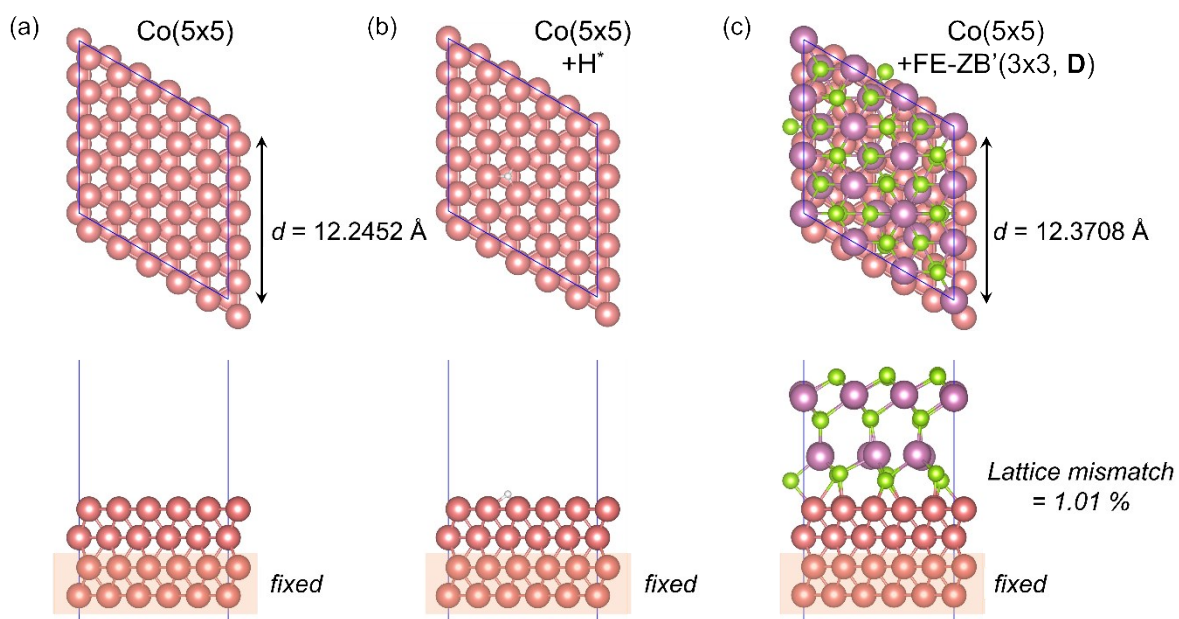

**Fig. S2.** The top view (top) and side view (bottom) of the atomic models of the catalysts based on cobalt metal substrates: (a) A 5×5 supercell with a four-layer hexagonal close-packed (HCP) cobalt slab (Co (5×5)), (b) Co (5×5) with a hydrogen adsorbent (H<sup>\*</sup>), and (c) a 3×3 supercell of FE-ZB' with downward polarization (**D**) that is stacked on top of Co (5×5). When obtaining optimized geometries, the atomic positions of the bottom two layers were fixed. The lattice mismatch between Co (5×5) and FE-ZB'(**D**) (3×3) was only 1.01%.

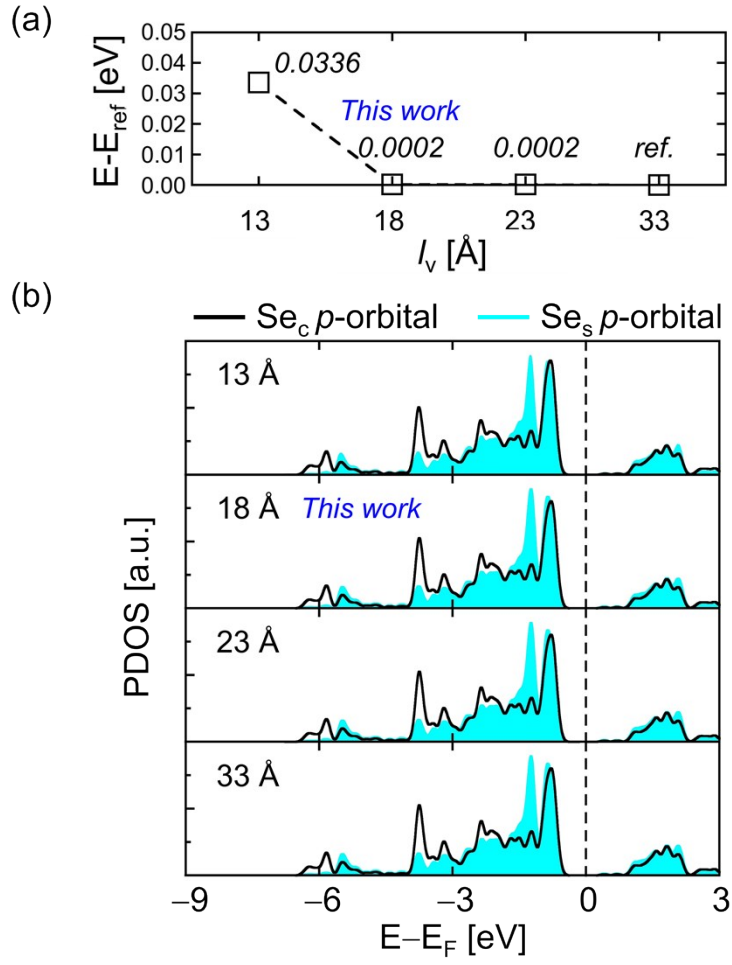

**Fig. S3.** (a) The relative energy ( $E_{rel}$ ) as a function of the length of vacuum space ( $l_v$ ).  $l_v$  is the distance between the two neighbouring periodic images along the plane-normal direction of Co+In<sub>2</sub>Se<sub>3</sub> heterostructure, and  $E_{rel}$  is defined as  $E - E_{ref}$  where  $E$  is the total energy and  $E_{ref}$  is the total energy of reference system (the case with  $l_v = 33$  Å). The values of  $E_{rel}$  for given  $l_v$  are written in the plot. (b) Projected density of states (PDOS) with different  $l_v$ . The figure confirms that  $l_v = 18$  Å gives the converged energy and PDOS, and this value is adopted in constructing atomic models throughout this study.

| $k$ -grid             | SCF convergence [eV] | Force convergence [eV] | $\Delta G_{H^*}$ [eV] |
|-----------------------|----------------------|------------------------|-----------------------|
| $2 \times 2 \times 1$ | $10^{-4}$            | 0.05                   | 0.710                 |
| $2 \times 2 \times 1$ | $10^{-4}$            | 0.01                   | 0.700                 |
| $2 \times 2 \times 1$ | $10^{-5}$            | 0.01                   | 0.701                 |
| $4 \times 4 \times 1$ | $10^{-4}$            | 0.05                   | 0.702                 |

**Table S1.** Values of  $\Delta G_{H^*}$  for  $\text{In}_2\text{Se}_3$   $1L(\mathbf{D})$ , obtained with different calculation parameters: Monkhorst-Pack  $k$ -grid, supercell dimensions, and SCF and force convergence criteria. Here, enhancing the self-consistent-field (SCF) convergence criterion for electronic structure calculations and force-convergence criterion for geometry relaxation will change the  $\Delta G_{H^*}$  only by  $\sim 0.01$  eV.

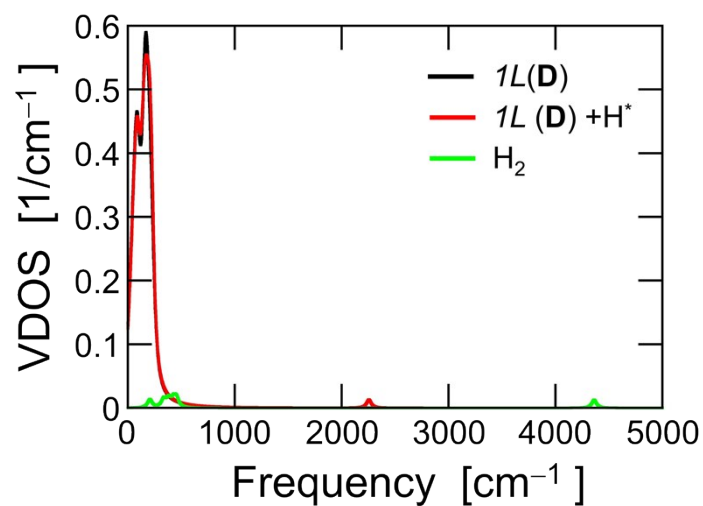

**Fig. S4.** Vibrational density of states (VDOS) of the species involved in the HER on the monolayer FE-ZB'  $\text{In}_2\text{Se}_3$  ( $1L$ ) with the downward polarization ( $\mathbf{D}$ ) state. Monolayer  $\text{In}_2\text{Se}_3$  ( $1L(\mathbf{D})$ ) with  $3\times 3$  supercell, the  $3\times 3$   $1L$  with an adsorbed hydrogen ( $1L(\mathbf{D}) + \text{H}^*$ ), and the isolated molecular hydrogen ( $\text{H}_2$ ) are indicated by black, red, and green lines, respectively. The values for each case were obtained from the separate calculations without fixing any of the atoms.

| Model                         | ZPE [eV] | ZPE per atom [eV/atom] | TS [eV] | TS per atom [eV/atom] |
|-------------------------------|----------|------------------------|---------|-----------------------|
| $1L(\mathbf{D})$              | 1.0275   | 0.0228                 | 5.0060  | 0.1112                |
| $1L(\mathbf{D}) + \text{H}^*$ | 1.2096   | 0.0263                 | 5.0088  | 0.1089                |
| $\text{H}_2$                  | 0.3823   | 0.1912                 | 0.0775  | 0.0388                |

**Table S2.** The zero-point energies (ZPEs) and entropies multiplied by the temperature ( $TS$ ) when  $T = 298.15$  K that are obtained for  $1L(\mathbf{D})$ ,  $1L(\mathbf{D}) + \text{H}^*$ , and  $\text{H}_2$ . The values were computed by adopting the VDOS (Fig. S4) which were obtained by using  $3 \times 3$  supercell  $1L(\mathbf{D})$ ,  $3 \times 3$   $1L(\mathbf{D})$  with an adsorbed hydrogen ( $1L(\mathbf{D}) + \text{H}^*$ ), and the isolated molecular hydrogen ( $\text{H}_2$ ). Focusing on the ZPE divided by the number of atoms, the gas-phase  $\text{H}_2$  has higher value than its solid-state counterparts ( $1L(\mathbf{D})$  and  $1L(\mathbf{D}) + \text{H}^*$ ). As can be seen from the Fig. S4, a hydrogen adsorption on  $1L$  introduces a peak at the high-frequency region ( $\sim 2200 \text{ cm}^{-1}$ ); this gives  $1L + \text{H}^*$  a higher ZPE than that of  $1L$ . However,  $TS$  undergoes only a negligible change upon H adsorption because its contribution to low-frequency region is only minute.

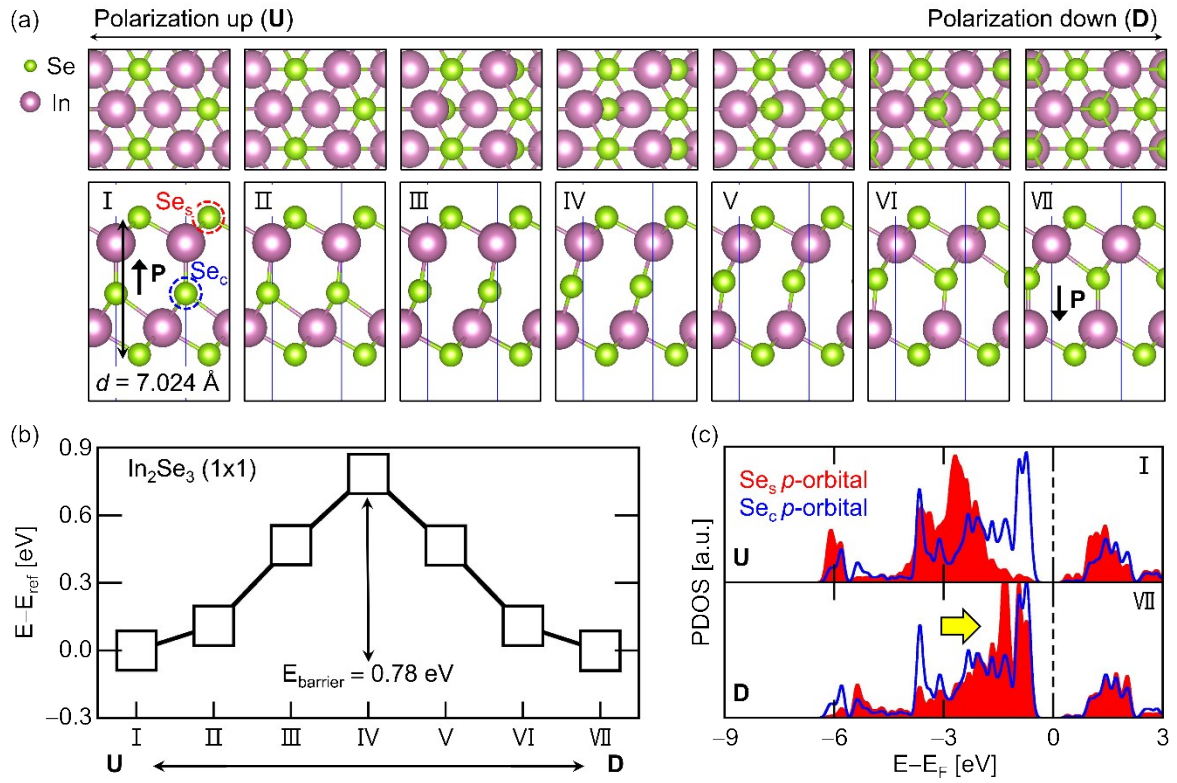

**Fig. S5.** (a) Atomic models of 1L FE-ZB'  $\text{In}_2\text{Se}_3$  with a step-by-step scheme of the polarization switching from **U** to **D**, subdivided from I to VII. The polarization direction and the thickness of 1L are denoted as  $\mathbf{P}$  and  $d$ , respectively.  $\text{Se}_s$  and  $\text{Se}_c$  indicate the surface and the central Se atoms within 1L, respectively. (b) The total energies for the unit cell  $\text{In}_2\text{Se}_3$  of the models from I to VII relative to the total energy of model I ( $E_{\text{ref}}$ ). The calculated energy barrier for the switching is  $E_{\text{barrier}} = 0.78 \text{ eV}$ . (c) Projected density of states (PDOS) of the **U** (model I) and **D** (model VII). The  $p$ -orbital contributions of  $\text{Se}_s$  and  $\text{Se}_c$  are indicated by the red shaded area and blue lines, respectively. The yellow arrow indicates the significant upshift of the peak at the valence band contribution of the  $\text{Se}_s$   $p$ -orbital state when switching from **U** to **D**.



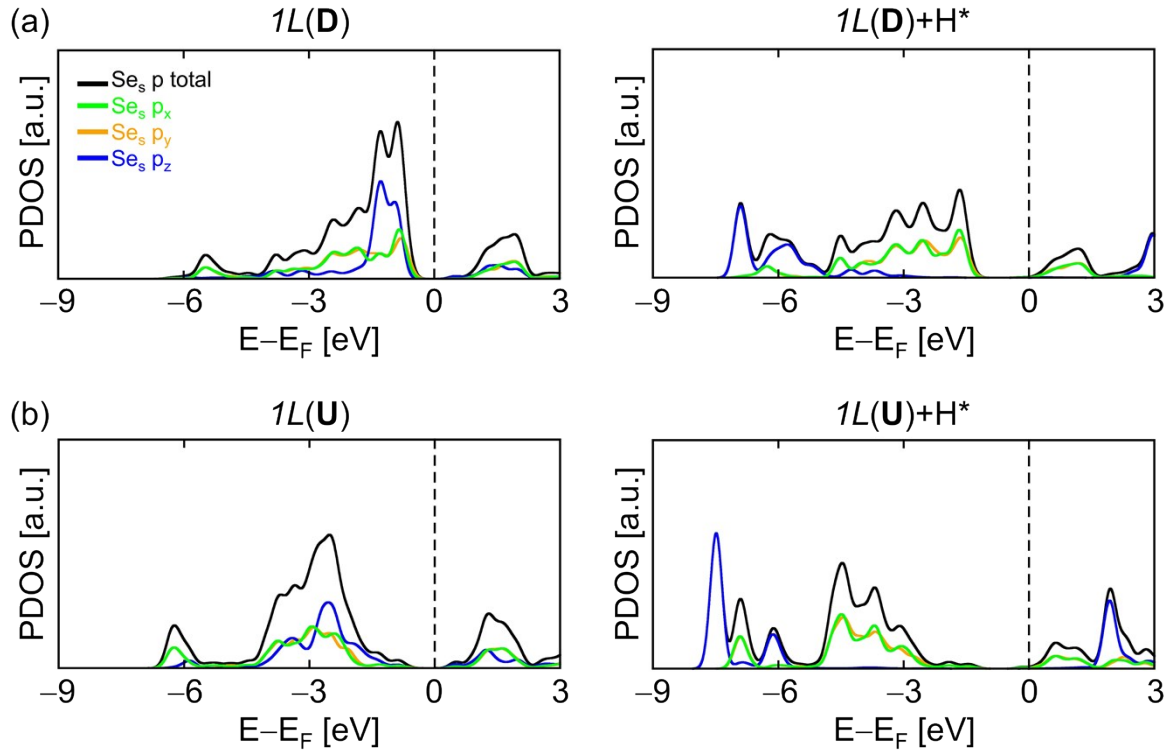

**Fig. S6.** PDOS for  $\text{Se}_s$   $p$ -orbital contributions for (a)  $1L(\mathbf{D})$  and  $1L(\mathbf{D})+\text{H}^*$ , and (b)  $1L(\mathbf{U})$  and  $1L(\mathbf{U})+\text{H}^*$ . Black, green, yellow, and blue lines indicate  $p$ ,  $p_x$ ,  $p_y$ , and  $p_z$  orbital contributions of  $\text{Se}_s$  atoms, respectively. Among others, the  $p_z$  orbital contributions below  $E_F$  in  $1L(\mathbf{D})/1L(\mathbf{U})$  greatly move downward after  $\text{H}^*$  adsorptions. This shows that the  $p$  orbital, specifically the  $p_z$  orbital, is the major contributor to the bond formation with H 1s.

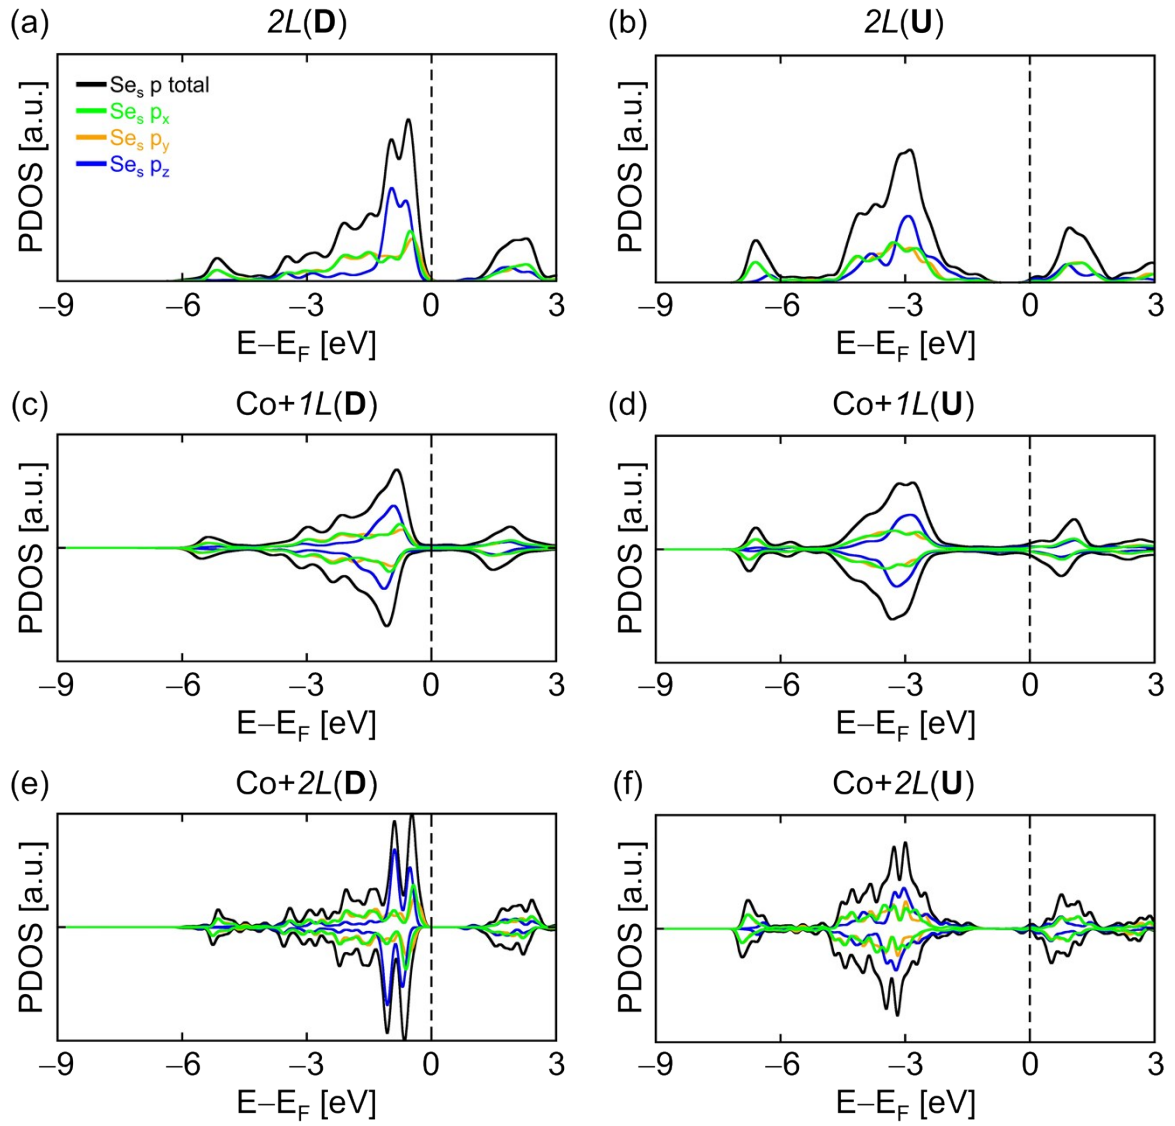

**Fig. S7.** PDOS for  $\text{Se}_s$   $p$ -orbital contributions for (a)  $2L(\mathbf{D})$ , (b)  $2L(\mathbf{U})$ , (c)  $\text{Co}+1L(\mathbf{D})$ , (d)  $\text{Co}+1L(\mathbf{U})$ , (e)  $\text{Co}+2L(\mathbf{D})$ , (f)  $\text{Co}+2L(\mathbf{U})$ . Black, green, yellow, and blue lines indicate  $p$ ,  $p_x$ ,  $p_y$ , and  $p_z$  orbital contributions of  $\text{Se}_s$  atoms, respectively.

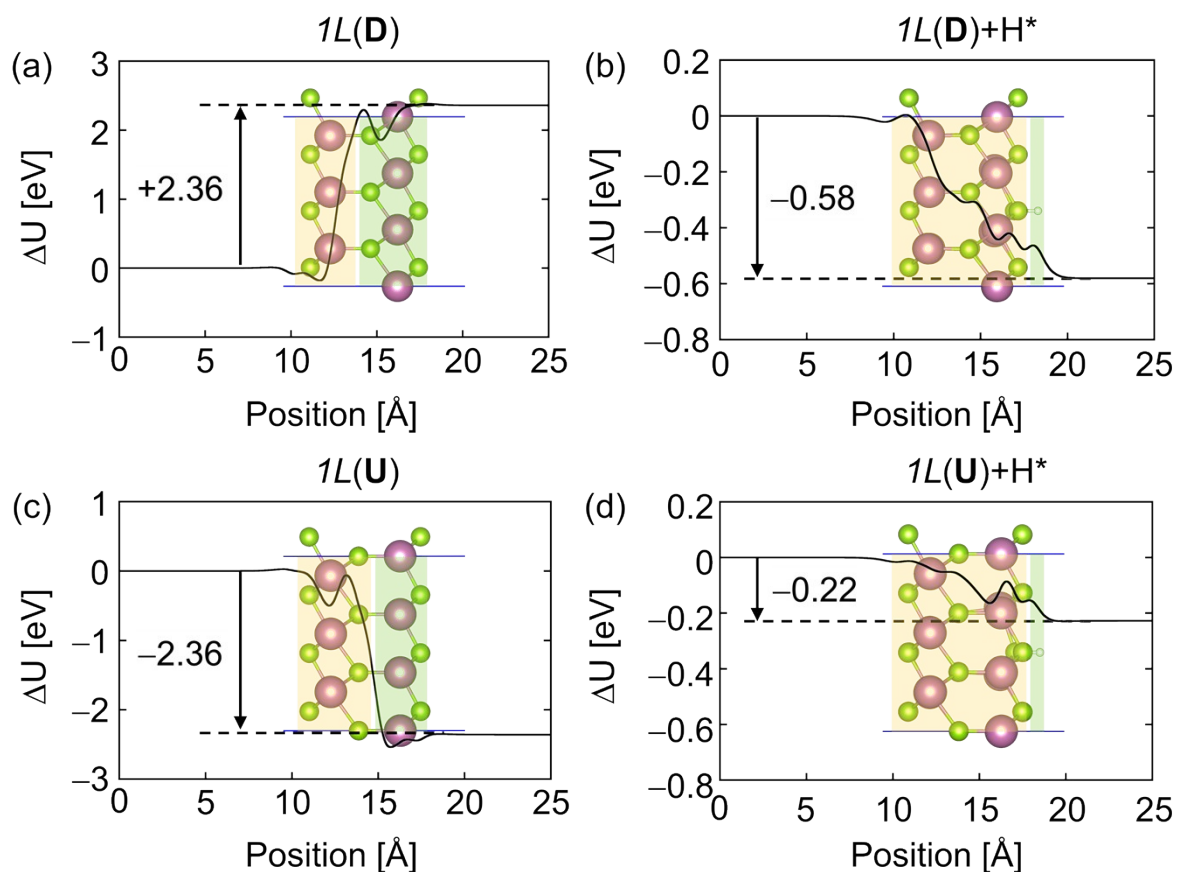

**Fig. S8.** Change in the potential energy of an electron ( $\Delta U$ ) due to the built-in potential within (a)  $1L(\mathbf{D})$  between InSe and InSe<sub>2</sub> sublayers, (b)  $1L(\mathbf{D})+\text{H}^*$  between  $1L(\mathbf{D})$  and  $\text{H}^*$ , (c)  $1L(\mathbf{U})$  between InSe and InSe<sub>2</sub> sublayers, (d)  $1L(\mathbf{U})+\text{H}^*$  between  $1L(\mathbf{U})$  and  $\text{H}^*$ . Bond dipole (BD) values were obtained as  $BD = U_{total} - U_A - U_B$ , where  $U_{total}$ ,  $U_A$ , and  $U_B$  indicate the potential energies of the system, subsystem A, and subsystem B, respectively. Subsystems A and B are represented by yellow and green shaded areas in each model.<sup>1</sup> BDs for  $1L(\mathbf{U})$  and  $1L(\mathbf{D})$  have the same absolute numbers with opposite signs. Upon hydrogen adsorptions, BDs for  $1L(\mathbf{D})+\text{H}^*$  and  $1L(\mathbf{U})+\text{H}^*$  read  $-0.58$  and  $-0.22$  eV, respectively. This indirectly implies that the  $1L(\mathbf{D})$  attracts electrons better and forms stronger Se-H bonding with larger BD than  $1L(\mathbf{U})$ .

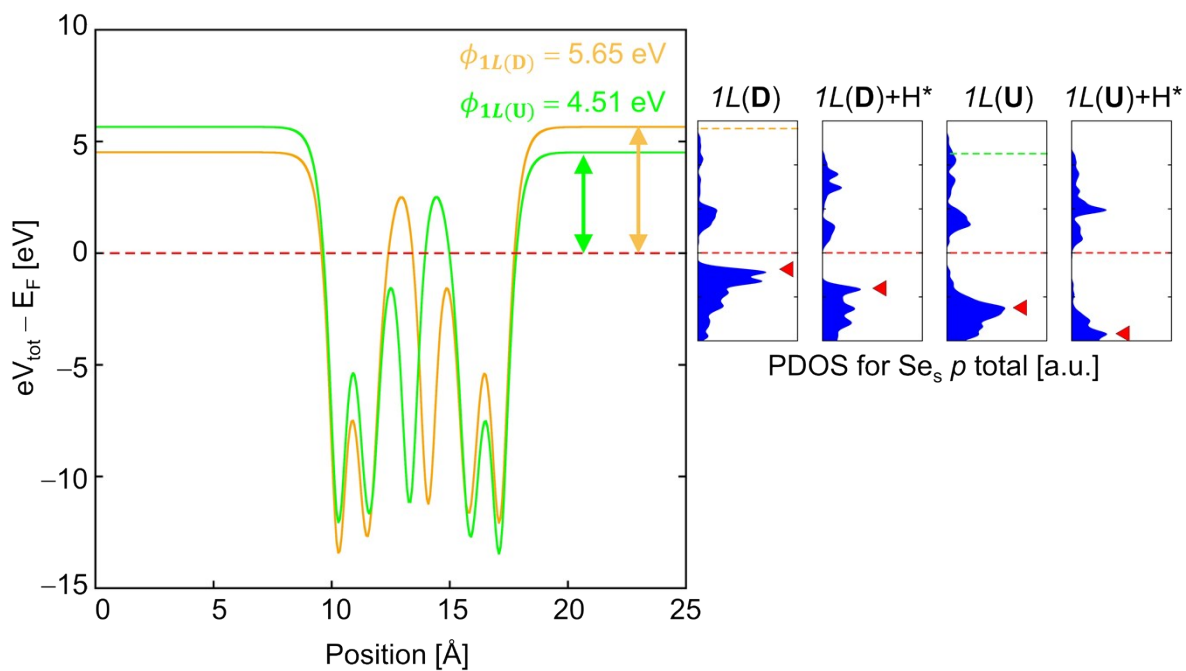

**Fig. S9.** The potential energies of electron which are aligned with respect to  $E_F$ . Yellow and green lines indicate  $1L(\mathbf{D})$  and  $1L(\mathbf{U})$  models, respectively. On the righthand side, a composite PDOS of  $\text{Se}_s$   $p$  orbitals for different models are shown. Red dashed lines indicate  $E_F$ . Red downward triangles indicate the location of the first peaks of filled  $p$ -orbitals. The figure shows that the energy states of  $1L(\mathbf{D})$  locate closer to  $E_F$  than those of its  $1L(\mathbf{U})$  counterpart. In both cases, H adsorption further attracts the peaks downwards.

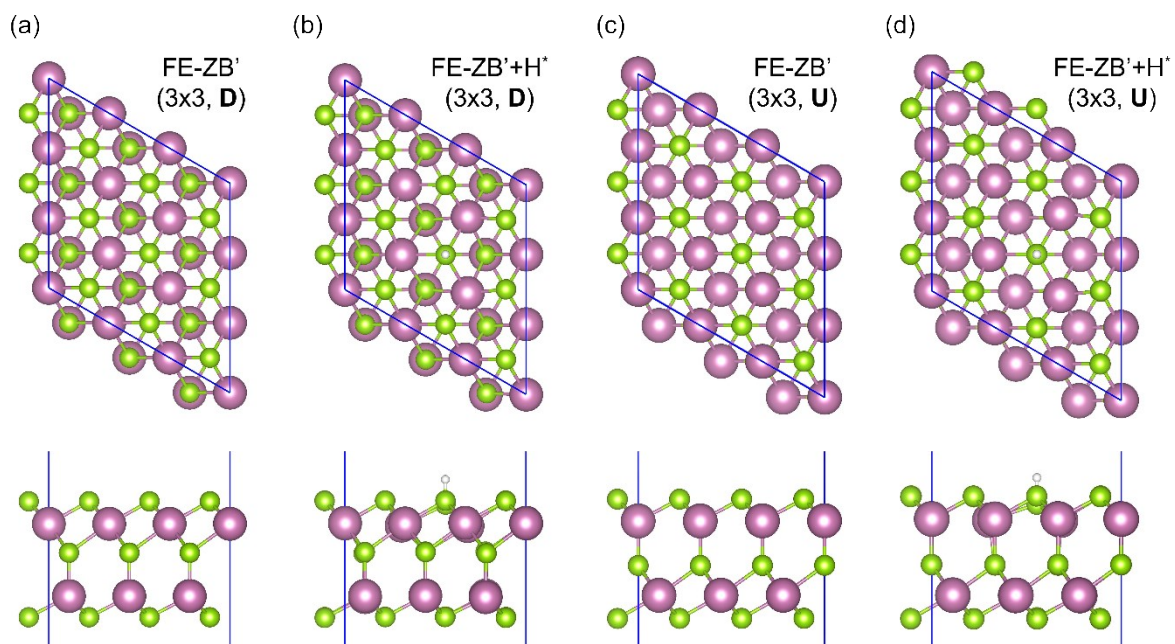

**Fig. S10.** The atomic structure of the 3×3 supercell (a) FE-ZB' in the **D** state, (b) FE-ZB' in the **D** state with H\*, (c) FE-ZB' in the **U** state, and (d) FE-ZB' in the **U** state with H\*.

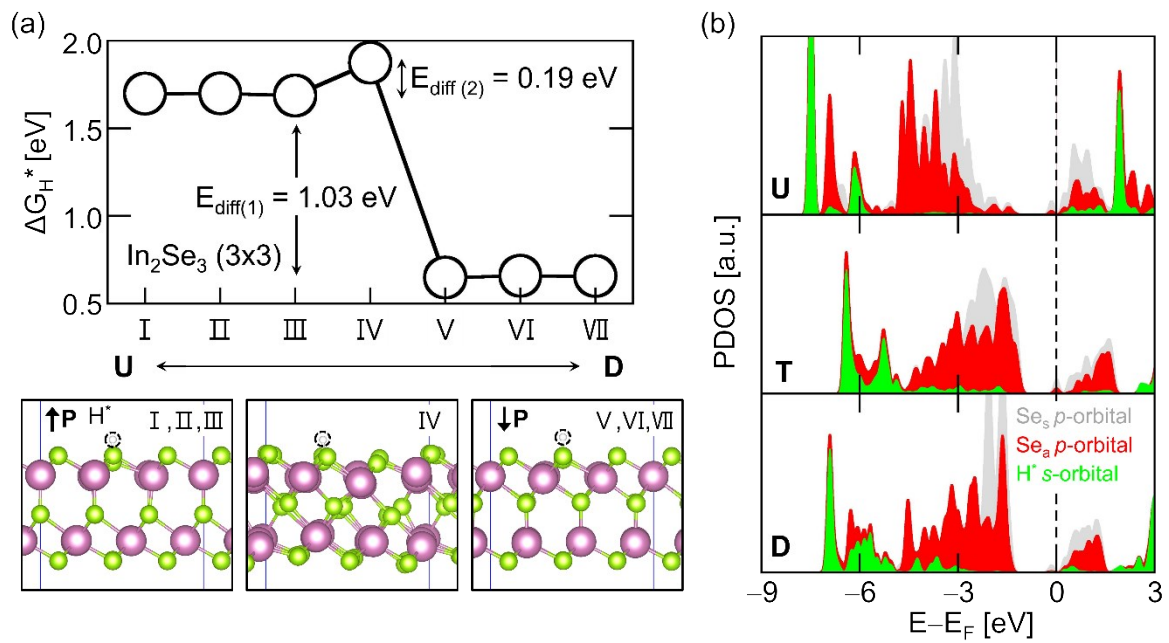

**Fig. S11.** (a) The free energies of the atomic hydrogen adsorption ( $\Delta G_{H^*}$ ) (up) and corresponding atomic structures (down) for the models from I to VII.  $E_{\text{diff}(1)}$  is defined as the difference in  $\Delta G_{H^*}$  between **U** and **D**, while  $E_{\text{diff}(2)}$  indicates the  $\Delta G_{H^*}$  difference between **U** and the metastable nonpolar structure (model IV, which is the transition state **T**). (b) PDOS of monolayer  $\text{In}_2\text{Se}_3$  with **U** (top), **T** (middle), and **D** (bottom) states. Gray, red, and green coloured areas indicate the  $p$ -orbital of  $\text{Se}_s$ , the  $p$ -orbital of  $\text{Se}_a$ , and the  $s$ -orbital state of  $\text{H}^*$ , respectively.

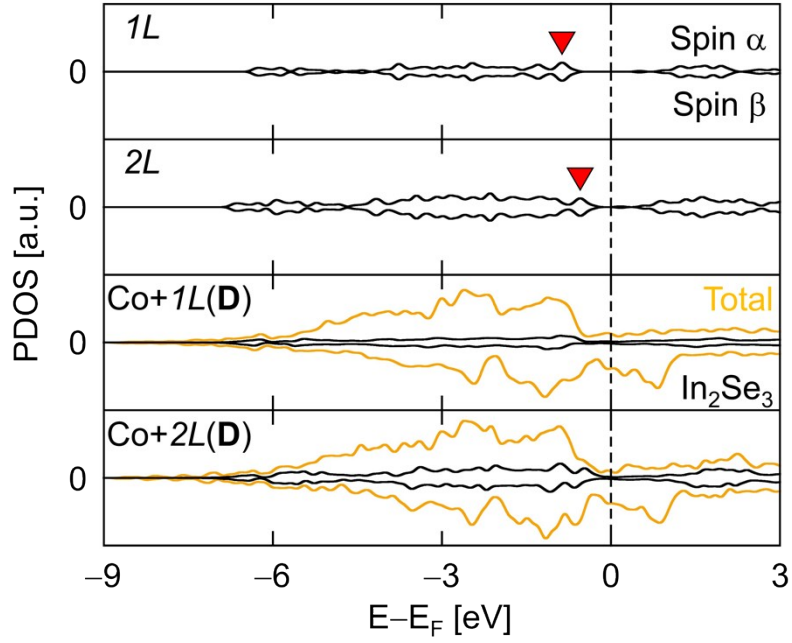

**Fig. S12.** Spin-resolved PDOS for *1L*, *2L*, *Co+1L(D)*, and *Co+2L(D)*. Black lines indicate PDOS of In<sub>2</sub>Se<sub>3</sub> only, while yellow lines represent that of the Co+In<sub>2</sub>Se<sub>3</sub> heterostructure.  $\alpha$  and  $\beta$  spin components are presented as positive and negative values, respectively. Red downward triangles indicate the  $\epsilon_{p\text{-peak}}$  values for *1L* and *2L*, with values of -0.87 and -0.54 eV, respectively.

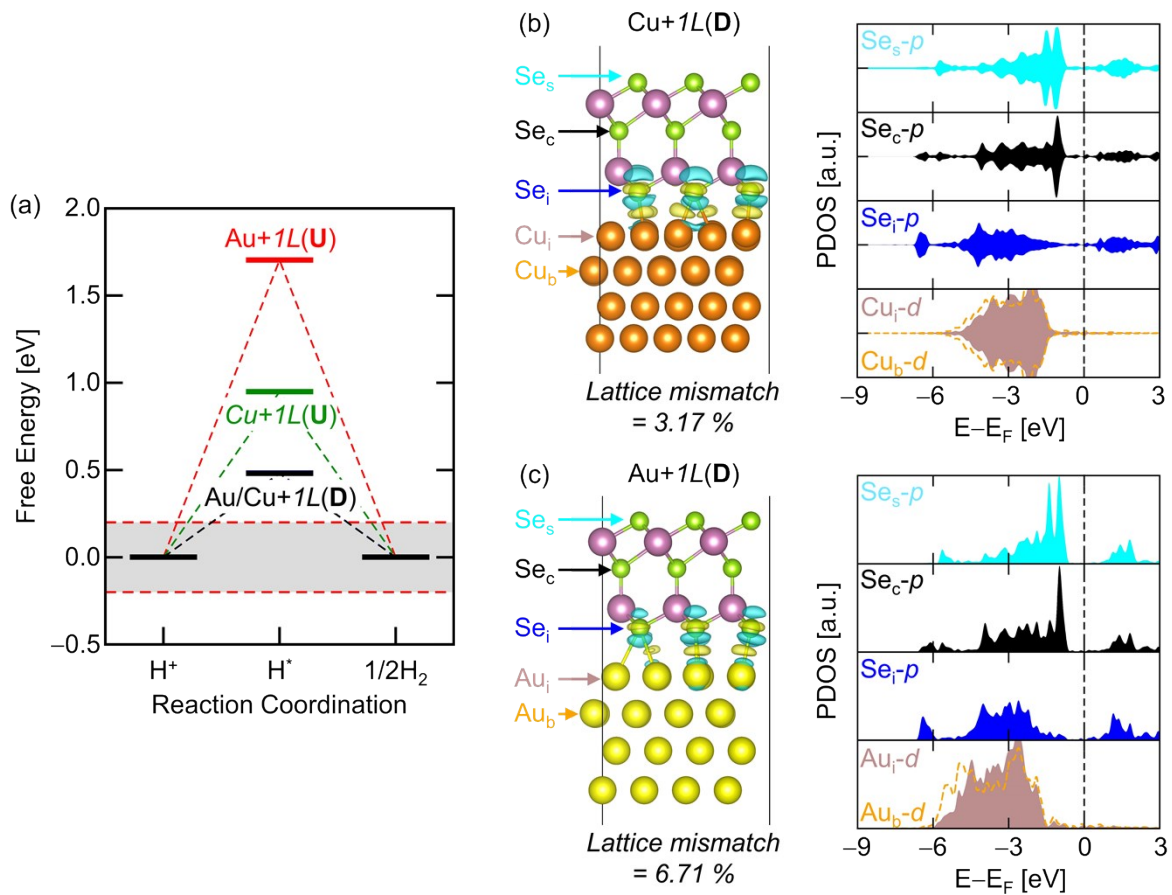

**Fig. S13.** (a) The free energy diagram for Au/Cu+1L cases. The  $\Delta G_{H^+}$  for Au+1L(U), Cu+1L(U), and Au/Cu+1L(D) are 1.702 eV, 0.948 eV, and 0.481 eV, respectively. The values exceed 0.2 eV in all cases, indicating that none of the four cases is favourable for HER. Atomic models that are overlaid with charge density difference (CDD) (left) and spin-resolved PDOS (right) for (b) Cu+1L(D) and (c) Au+1L(D). The isovalue is  $0.001 \text{ e}/\text{\AA}^3$ , while yellow and cyan colours represent positive and negative values, respectively. Cu and Au are reactive and noble diamagnetic metals, respectively, so the  $\alpha$  and  $\beta$  spins are degenerated.



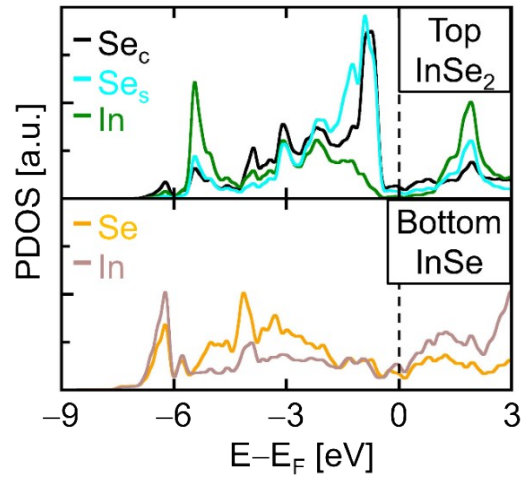

**Fig. S14.** PDOS of the InSe<sub>2</sub> (top) and InSe (bottom) sublayers of the Co+1L(D) model. The Se atom in the bottom InSe layer is in direct contact with the Co slab, while the Se<sub>s</sub> in the top InSe<sub>2</sub> layer is exposed as an active surface. The bottom InSe loses its bandgap and becomes metallic, due to the effect of Co slab. Interestingly, even the top InSe<sub>2</sub> exhibits finite values in PDOS nearby E<sub>F</sub> and shows slight induced metallicity at its bandgap region.

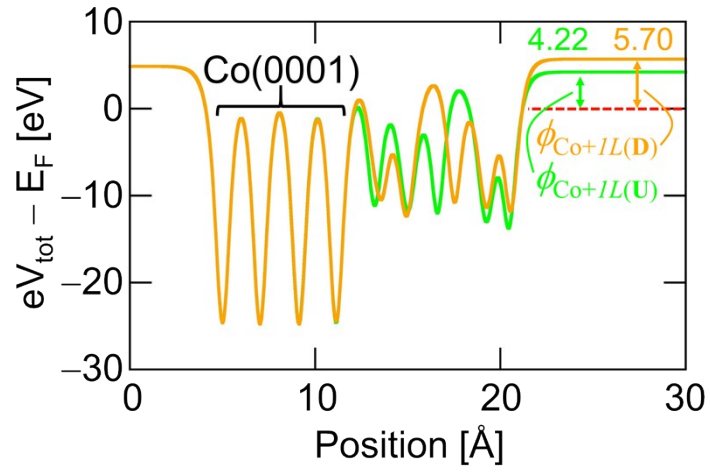

**Fig. S15.** Plane-averaged total potential energies of Co+1L(**D**) and Co+1L(**U**) that are indicated by orange and green lines, respectively. The work functions are represented by  $\phi_{\text{Co+1L}(\mathbf{U})}$  for Co+1L(**U**) and  $\phi_{\text{Co+1L}(\mathbf{D})}$  for Co+1L(**D**).  $\phi_{\text{Co+1L}(\mathbf{U})} = 4.22 \text{ eV} < \phi_{\text{Co+1L}(\mathbf{D})} = 5.70 \text{ eV}$  indicates that the polarization reversal of the  $\text{In}_2\text{Se}_3$  effectively modifies the surface potential energies and corresponding surface energy states by  $\sim 1.5 \text{ eV}$  with the aid of built-in potential.

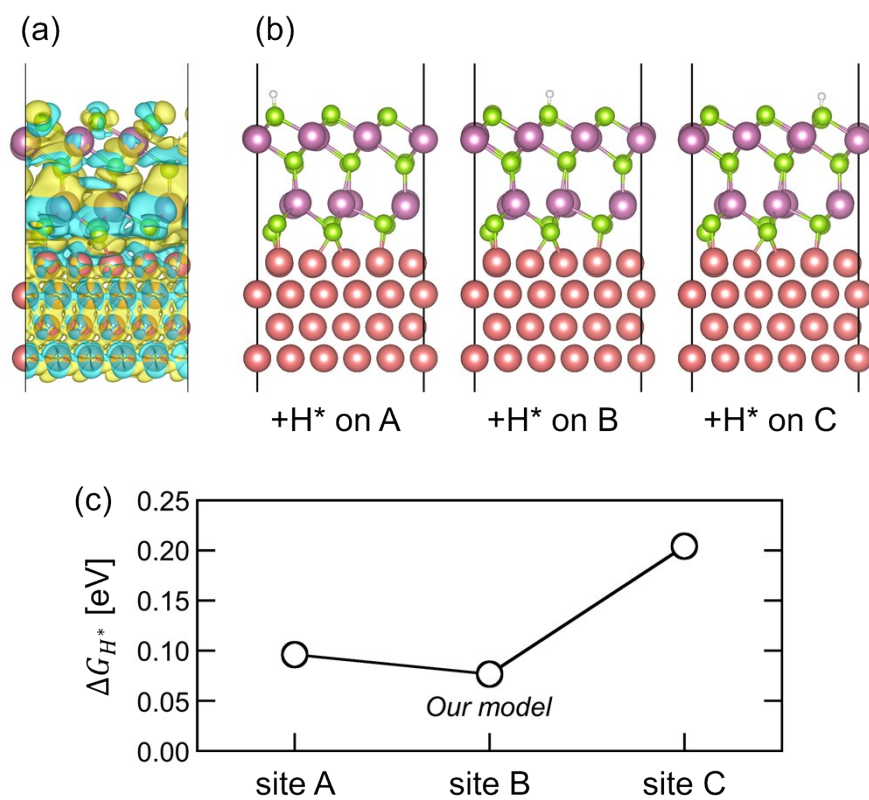

**Fig. S16.** (a) CDD of Co+1L(D) model, plotted by adopting the isovalue of  $0.0002 \text{ e}/\text{\AA}^3$ . (b) Atomic models for hydrogen adsorptions on Co+1L(D) at different adsorption sites; site A, B, and C. (c)  $\Delta G_{H^*}$  obtained for different adsorption sites, and  $\Delta G_{H^*} < 0.20 \text{ eV}$  for all cases. Site B, which shows the lowest  $\Delta G_{H^*}$ , can be thought of as an active-site  $\text{Se}_s$  for HER. Electronic structure analysis are shown for the case with site B throughout this paper.

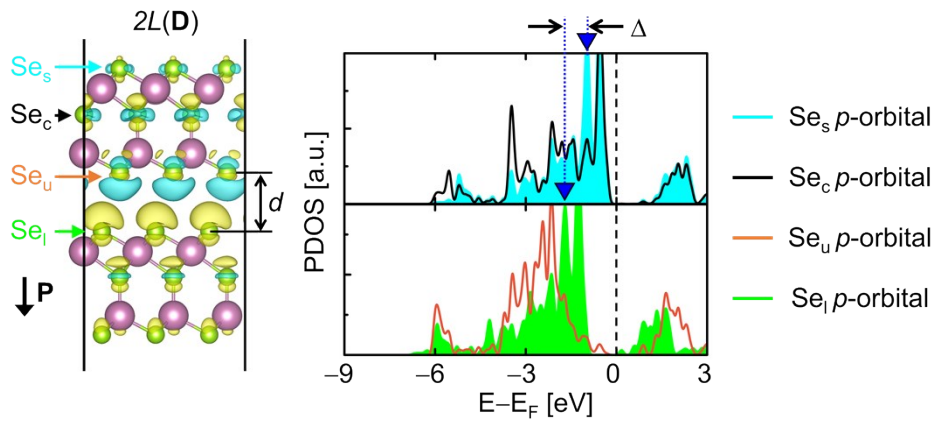

**Fig. S17.** The charge density difference between the two  $\text{In}_2\text{Se}_3$  layers (left) and the PDOS (right) for  $2L(\mathbf{D})$ . Yellow and cyan colours represent positive (excessive electrons) and negative (deficient electrons) values, respectively. Due to the interface dipole, the upper and the lower layers have noticeable negative and positive CDD values, respectively. The types of atoms in the models are indicated by coloured arrows, and the same colours are used to represent the PDOS: cyan, black, orange, and green represent the  $p$ -orbitals of  $\text{Se}_s$ ,  $\text{Se}_c$ ,  $\text{Se}_u$ , and  $\text{Se}_l$ , respectively. The energy location of the local VBM-1 of outer surface Se atoms of the upper and lower layers ( $\text{Se}_s$  and  $\text{Se}_l$ ) are marked by the blue downward triangles, and  $\Delta = 0.73$  eV quantifies their difference. This indicates that the electron tunnelling channels between the two  $\text{In}_2\text{Se}_3$  layers through the VBM are unlikely to open for the case with  $2L(\mathbf{D})$ . The isovalue is  $0.0001 \text{ e}/\text{\AA}^3$ , which is only half of the value used in Fig. 3.  $d = 3.93$  \AA is the interlayer distance between the two layers.

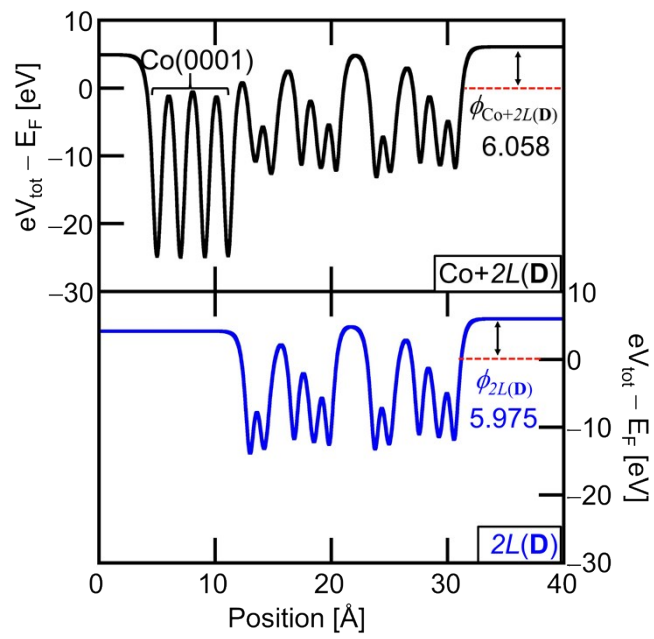

**Fig. S18.** Plane-averaged total potential energies of Co+2L(D) (top) and 2L(D) (bottom). The workfunction of the two models differs by  $\sim 0.1$  eV.

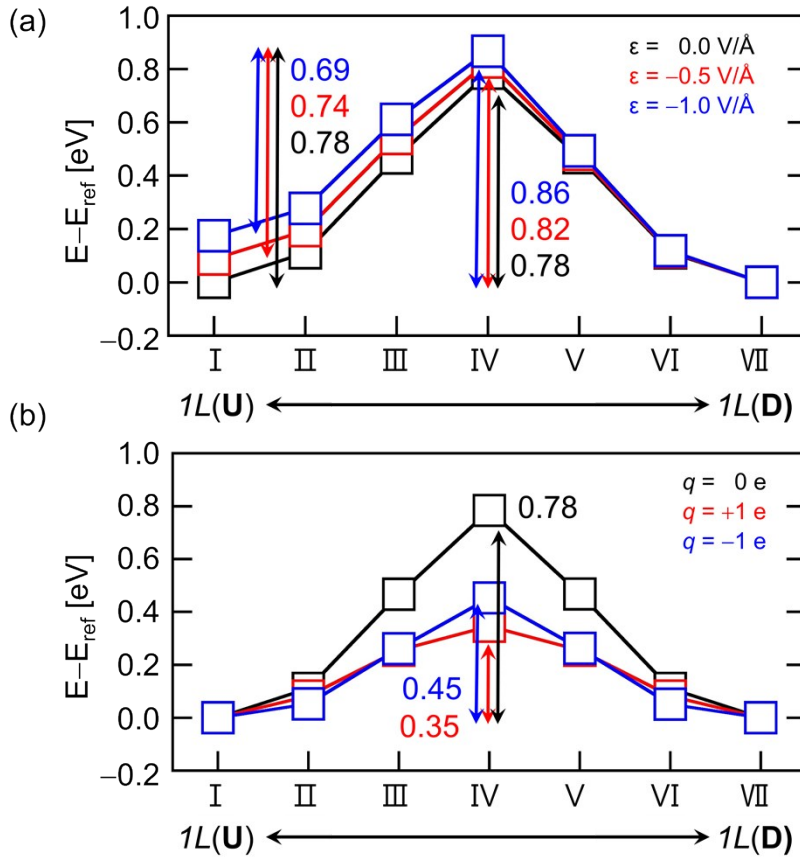

**Fig. S19.** The modulation of total energies relative to  $E_{ref}$  for the free-standing unit cell  $\text{In}_2\text{Se}_3$  of the models from I to VII (as indicated in Fig. S5), with respect to the (a) applied external electric field  $\epsilon$  along the plane-normal direction of  $\text{In}_2\text{Se}_3$  and (b) net charge  $q$ . The reference energy,  $E_{ref}$ , refers to the total energy of model VII. Models I and VII respectively indicate  $1L(\mathbf{U})$  and  $1L(\mathbf{D})$ . For  $\epsilon$ , only the negative values were considered due to the symmetry. The energy barrier for polarization conversion of  $\text{In}_2\text{Se}_3$  is 0.78 eV per unit cell  $\text{In}_2\text{Se}_3$  without applying external stimuli. Increasing either  $\epsilon$  or  $q$  effectively reduces the energy barrier, and further increasing the intensity of these external stimuli will further reduce the energy barrier. This shows that, while the structure of  $\mathbf{U}$  and  $\mathbf{D}$  is stable enough, applying external stimuli will induce the structural conversion between  $\mathbf{U}$  and  $\mathbf{D}$ . The  $q$  values were included as non-zero net charge in the simulation cell where the boundary condition for coulomb potential is determined from a multipole expansion, as implemented in GPAW code.<sup>2</sup>

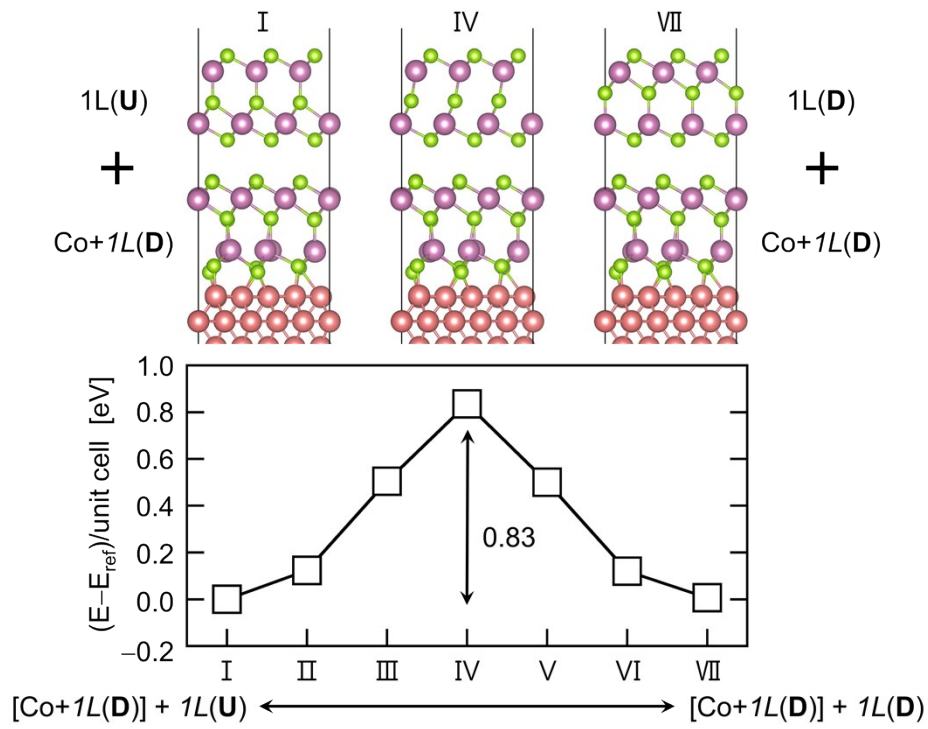

**Fig. S20.** Total energies relative to  $E_{ref}$  Co+2L during the polarization switching of the top 1L from **U** to **D** while the bottom Co+1L(**D**) remains unchanged. The reference energy,  $E_{ref}$ , refers to the total energy of model VII. The energy barrier for the polarization conversion is obtained as 0.83 eV per unit cell  $\text{In}_2\text{Se}_3$ , so that the increment due to the presence of Co is only 0.05 eV per unit cell.

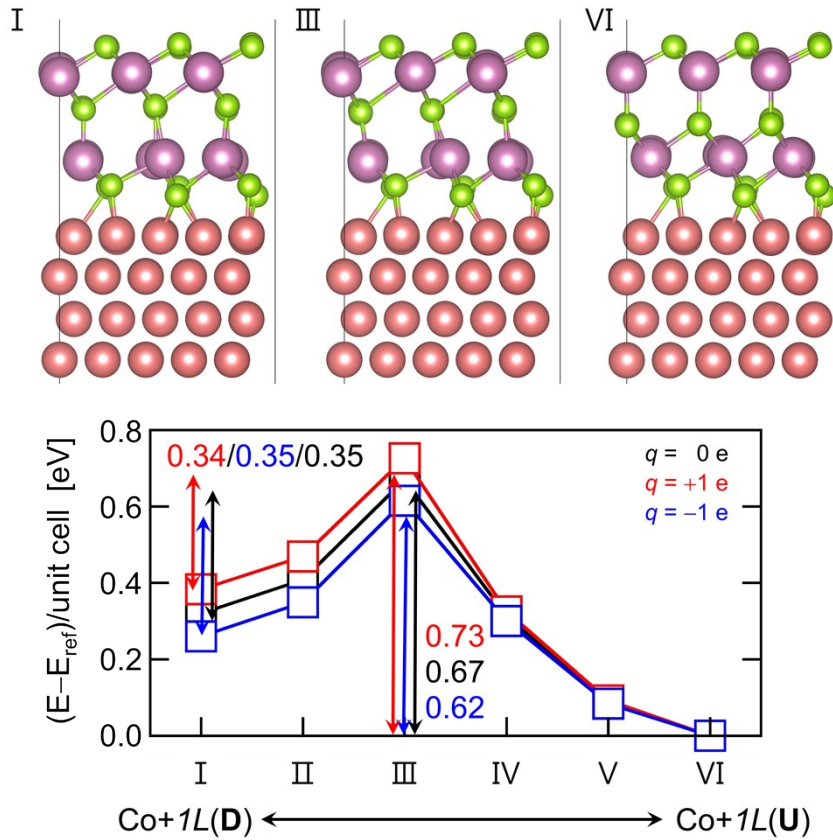

**Fig. S21.** The modulation of total energies relative to the  $E_{\text{ref}}$  for the  $\text{Co}+1L$  from I to VI under different net charge  $q$ . The reference energy,  $E_{\text{ref}}$ , refers to the total energy of model VI. The energy is scaled by the unit cell  $\text{In}_2\text{Se}_3$ , and  $q$  is for the heterostructure of  $\text{In}_2\text{Se}_3$  with  $3 \times 3$  supercell and Co with  $5 \times 5$  supercell. The energy values in this figure are scaled to the unit cell of  $\text{In}_2\text{Se}_3$ , while the charge  $q$  is given for the heterostructure of  $3 \times 3 \text{ In}_2\text{Se}_3$  and  $5 \times 5 \text{ Co}$ . Thus, the  $q = 0, +1,$  and  $-1e$  for this model correspond to the  $q' = 0, +1/9,$  and  $-1/9e$  for unit cell dimension of  $\text{In}_2\text{Se}_3$ , respectively. The energy barrier per ferroelectric unit is more than 10 times larger than thermal energy ( $\sim kT$  where  $k$  is the Boltzmann's constant and  $T$  is the temperature), implying its proper stability. Then, applying a negatively larger  $q$  will greatly lower the energy barrier. Simultaneously, the energy of  $\text{Co}+1L(\mathbf{D})$  relative to  $\text{Co}+1L(\mathbf{U})$  will be further reduced. At the end, the energy of  $\text{Co}+1L(\mathbf{D})$  can be even lower than that of  $\text{Co}+1L(\mathbf{U})$ . This indicates that the external stimuli that has a form of backgate bias voltage can induce the polarization conversion between  $\text{Co}+1L(\mathbf{D})$  and  $\text{Co}+1L(\mathbf{U})$ . More thorough theoretical discussions on the ON-OFF conversion dynamics of  $\text{Co-In}_2\text{Se}_3$  heterostructures within the non-equilibrium external stimuli will be covered in the following study. The  $q$  values were included as non-zero net charge in the simulation cell where the boundary condition for coulomb potential is determined from a multipole expansion, as implemented in GPAW code.<sup>2</sup>



### Supplementary References

1. G. Heimel, L. Romaner, E. Zojer and J.-I. Bredas, *Acc. Chem. Res.*, 2008, **41**, 721-729.
2. J. Enkovaara, C. Rostgaard, J. J. Mortensen, J. Chen, M. Duřak, L. Ferrighi, J. Gavnholt, C. Glinsvad, V. Haikola, H. A. Hansen, H. H. Kristoffersen, M. Kuisma, A. H. Larsen, L. Lehtovaara, M. Ljungberg, O. Lopez-Acevedo, P. G. Moses, J. Ojanen, T. Olsen, V. Petzold, N. A. Romero, J. Stausholm-Møller, M. Strange, G. A. Tritsarlis, M. Vanin, M. Walter, B. Hammer, H. Häkkinen, G. K. H. Madsen, R. M. Nieminen, J. K. Nørskov, M. Puska, T. T. Rantala, J. Schiøtz, K. S. Thygesen and K. W. Jacobsen, *J. Phys. Condens. Matter*, 2010, **22**, 253202.
